# Supplementary material for: The value of folate receptor-positive circulating tumour cells as a diagnostic biomarker for lung cancer: a systematic review and meta-analysis
Source: PubMed Central journal article supplement — J Int Med Res. 2023 Sep 26;51(9):03000605231199763. doi: 10.1177/03000605231199763 (PMC10536849; doi:10.1177/03000605231199763), 2023-09-26

22:59

5G 74%

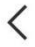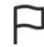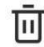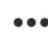

## PROSPERO Registration message [374112]

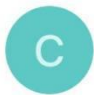

CRD-REGISTER 22/11/20

发给 cfj199703 ▾

Dear Mr Fangjun,

We apologise for the delay in dealing with your registration, an ever-increasing number of applications has led to a backlog and substantial delays for some users.

PROSPERO is currently prioritising submissions related to COVID-19. To enable us to focus on these submissions, and to avoid additional delay, during the pandemic we will automatically process submissions that have been waiting more than 30 days.

Automatic processing will reject records:

- That appear to be scoping reviews
- That appear to be of sporting performance
- That have insufficient information in fields
- That have been submitted in a non-English language

↩ 回复

➡ 转发

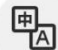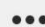

Supplement: sj-pdf-1-imr-10.1177_03000605231199763.pdf [file sj-pdf-1-imr-10.1177_03000605231199763.pdf]
